# Supplementary material for: Canine Endogenous Oxytocin Responses to Dog-Walking and Affiliative Human–Dog Interactions
Source: Animals (Basel). 2019 Feb 8;9(2):51. doi: 10.3390/ani9020051 (PMC6406532; doi:10.3390/ani9020051)
Supplement: Supplementary file 1 [file animals-09-00051-s001.pdf]

## Supplementary Materials

**Table S1.** Dog breeds (n=26)

| Dog breed                              | Frequency | Breed Group |
|----------------------------------------|-----------|-------------|
| Border Collie                          | 1         | Herding     |
| Border Collie cross                    | 2         | Herding     |
| English Pointer                        | 1         | Sporting    |
| English Springer Spaniel               | 1         | Sporting    |
| Jack Russell                           | 3         | Terrier     |
| Jack Russell cross                     | 2         | Terrier     |
| Labrador                               | 3         | Sporting    |
| Miniature Schnauzer                    | 1         | Terrier     |
| Poodle                                 | 1         | Toy         |
| Toy poodle cross                       | 2         | Toy         |
| Poodle cross Labrador/Golden Retriever | 3         | Sporting    |
| Pug                                    | 1         | Toy         |
| Shih-Tzu cross                         | 1         | Toy         |
| Staffordshire bull terrier             | 1         | Terrier     |
| Staffordshire bull terrier cross       | 3         | Terrier     |

**Table S2.** Sub-group analyses of estimated mean change of urinary oxytocin concentration from pre to post-condition by dog breed and age

| Condition (I)                                            | Estimated mean change (pg/mg) (95% CI) |
|----------------------------------------------------------|----------------------------------------|
| Breed                                                    |                                        |
| <i>Sporting and herding (n=11)</i>                       |                                        |
| DW                                                       | -23.11 (-81.19, 34.98)                 |
| H-DI                                                     | -8.33 (-67.02, 50.35)                  |
| <i>Terrier (n=10)</i>                                    |                                        |
| DW                                                       | -23.79 (-69.28, 21.70)                 |
| H-DI                                                     | 18.14 (-33.41, 69.68)                  |
| <i>Toy (n=5)</i>                                         |                                        |
| DW                                                       | 52.18 (-8.68, 113.03)                  |
| H-DI                                                     | 23.92 (-36.94, 84.77)                  |
| Age                                                      |                                        |
| <i>Less than or equal to median age (7 years) (n=16)</i> |                                        |
| DW                                                       | -42.92 (-94.20, 8.35)                  |

|                                                                                                                                                                                                                                                                                                                                                                                                                                                                                                                              |                      |
|------------------------------------------------------------------------------------------------------------------------------------------------------------------------------------------------------------------------------------------------------------------------------------------------------------------------------------------------------------------------------------------------------------------------------------------------------------------------------------------------------------------------------|----------------------|
| H-DI                                                                                                                                                                                                                                                                                                                                                                                                                                                                                                                         | 6.79 (-47.72, 61.30) |
| <i>Above median age (7 years) (n=10)</i>                                                                                                                                                                                                                                                                                                                                                                                                                                                                                     |                      |
| DW                                                                                                                                                                                                                                                                                                                                                                                                                                                                                                                           | 0.83 (-30.97, 32.62) |
| H-DI                                                                                                                                                                                                                                                                                                                                                                                                                                                                                                                         | 27.56 (-4.23, 59.35) |
| <p><i>DW</i>: dog-walking, <i>H-DI</i>: human-dog interaction<br/> n; number of participants in sample<br/> Condition duration (min) and latency of urine collection evaluated at the mean value.<br/> Mean change for each condition was estimated using a linear mixed model with a) participant as a random effect; b) condition, order of conditions, condition duration (min) and latency of urine sample collection (min) as fixed effects<br/> Adjustment for multiple comparisons: least significant difference.</p> |                      |
